# Supplementary material
Source: publisher site journal article supplement (https://www.dovepress.com/article/555760)
Supplement: Supplementary file 1 [file 555760%20supporting%20information%20for%20corrections_1_1.docx]

**Supporting Information**

**
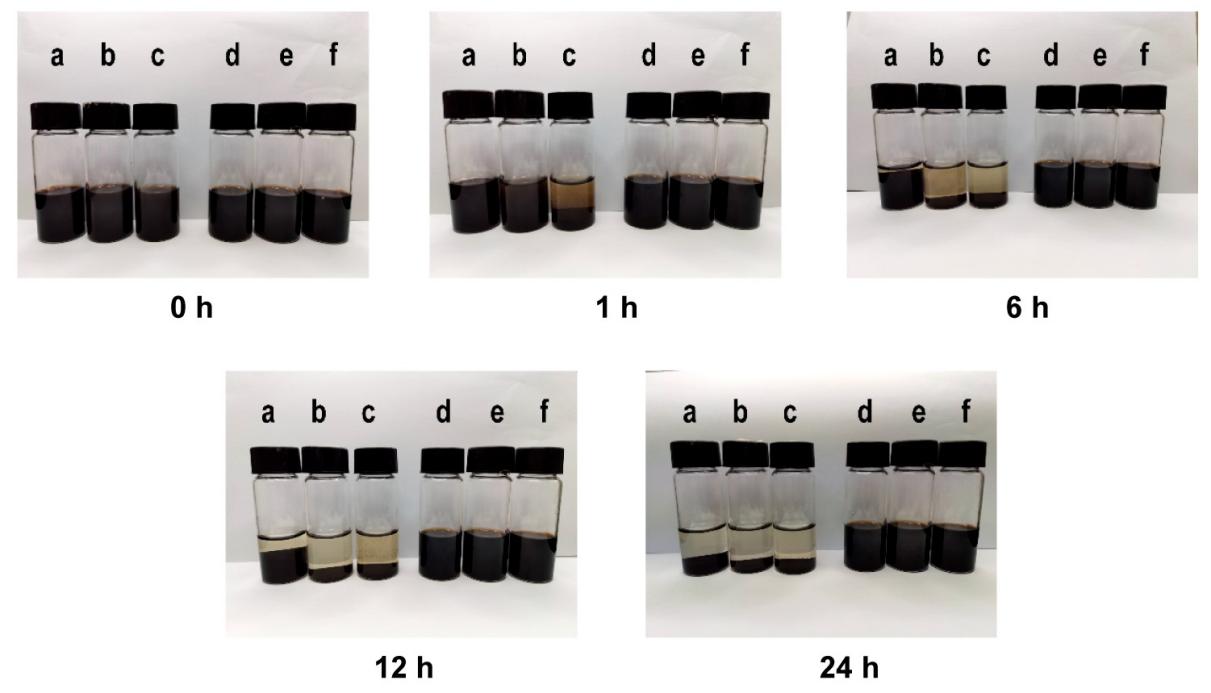
**

**Figure S1.** Dispersion stability of PDA and PEG-PDA NPs of different sizes in PBS at different time points. a. 50–100 nm PDA b. 100–150 nm PDA c. 150–200 nm PDA d. 50–100 nm PEG-PDA e. 100–150 nm PEG-PDA f. 150–200 nm PEG-PDA


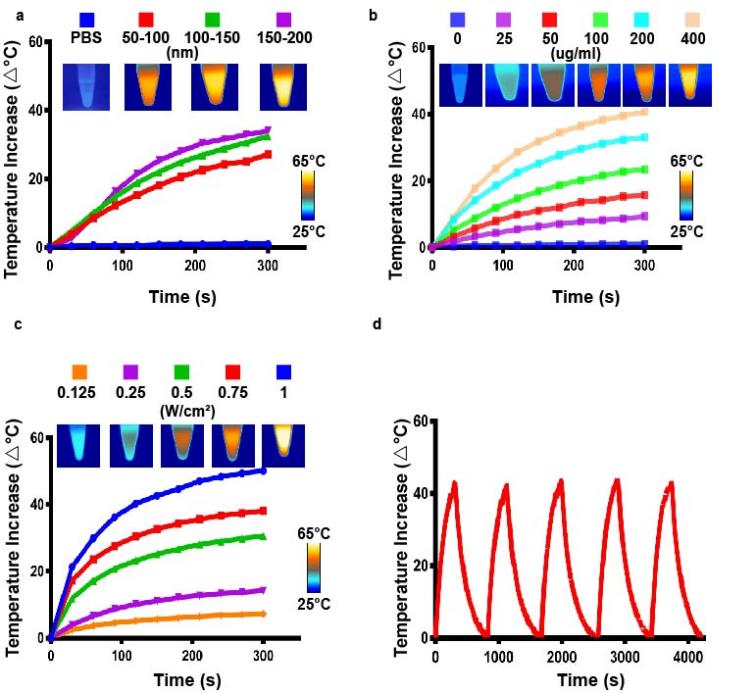


**Figure S2.** *In vitro* photothermal characterization of PPIG NPs. a. Temperature changes in solutions of the PPIG NPs of different sizes (400 μg/mL) in PBS under 808-nm laser irradiation (1 W/cm²) for 5 min. Inset: thermal images of PPIG NPs of different sizes (400 μg/mL) after constant 808-nm laser irradiation for 5 min. b. Temperature changes of varying concentrations of 150-200nm NPs (0, 25, 50, 100, 200, 400 μg/mL) in PBS under 808-nm laser irradiation (1 W/cm²) for 5 min. Inset: thermal images of 150-200nm PPIG NPs at indicated concentrations after constant 808-nm laser irradiation for 5 min. c. Temperature changes of 150-200nm PPIG NPs (400 μg/mL) under 808-nm laser irradiation at various power densities (0.125, 0.25, 0.5, 0.75, 1 W/cm²). Inset: thermal images of 150-200nm PPIG NPs (400 μg/mL) after constant 808-nm laser irradiation at indicated power densities for 5 min. d. Temperature elevation in the solution of 150-200nm PPIG NPs (400 μg/mL) in PBS over five cycles of NIR laser irradiation (808 nm, 1 W/cm²).


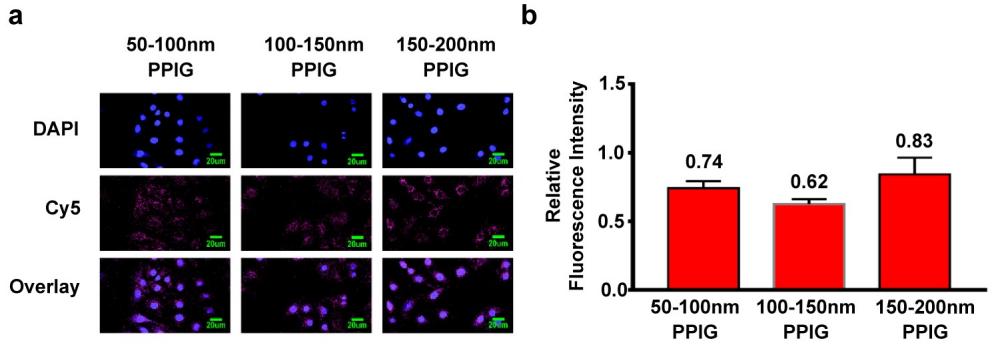


**Figure S3.** *In vitro* cellular uptake of PPIG NPs. a. Fluorescence imaging of SVEC4-10 cells incubated with the different-sized PPIG NPs (100 μg/mL) for 12 h. Images were acquired at the cy5.5 channel (670 nm) and DAPI channel (358 nm). Scale bar: 10 μm. b. Mean fluorescence intensity of SVEC4-10 cells incubated with different sizes of PPIG (100 μg/mL) for 12 h.


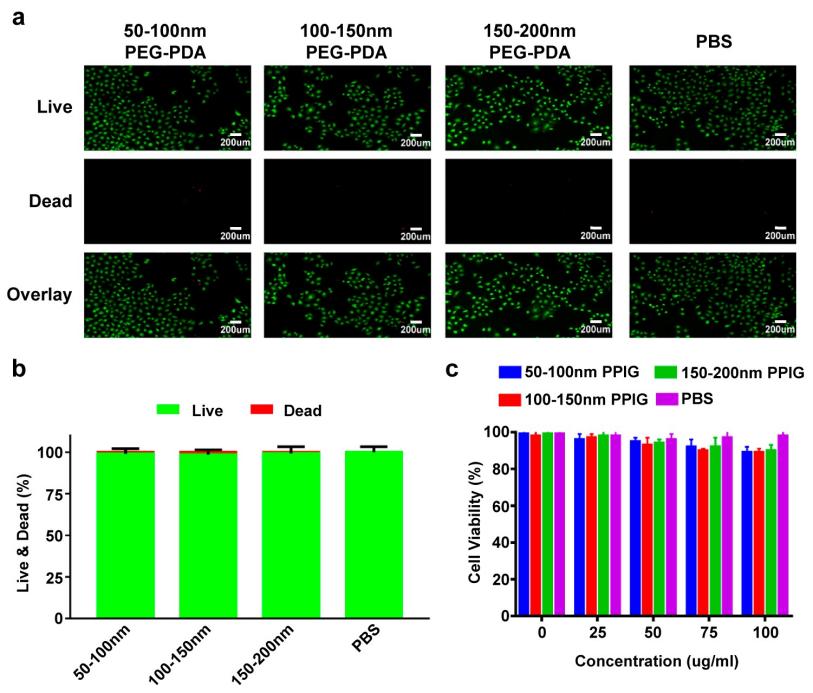


**Figure S4.** *In vitro* biosafety of PPIG NPs. a. Fluorescence imaging of SVEC4-10 cells incubated with the different-sized PPIG NPs (100 μg/mL) for 24 h. Green and red fluorescence in cells stained with calcein AM and PI indicate live and dead cells, respectively. Scale bar: 100 μm. b. Live-to-dead SVEC4-10 cell ratio after incubation with different-sized PPIG (100 μg/mL) for 24 h. c. Viabilities of SVEC4-10 cells incubated with different-sized PPIG NPs at various concentrations (0, 25, 50, 75, 100 μg/mL).


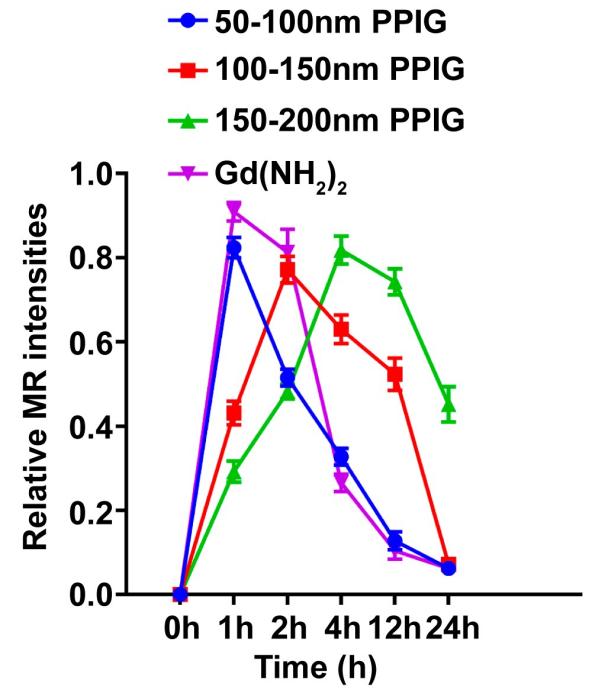


**Figure S5.** Average relative T1-weighted MRI signal intensities of the LN over 24 h after the injection of PPIG NPs of different sizes. (general linear model repeated measures) (n = 3).


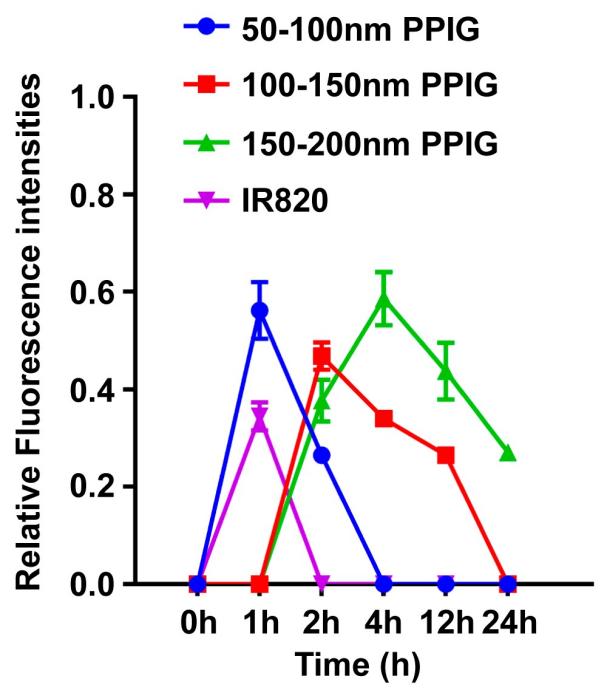


**Figure S6.** Average relative normalized fluorescence intensity of the LNs over 24 h after injection of PPIG NPs of different sizes and IR820 dye. (general linear model repeated measures) (n = 3).


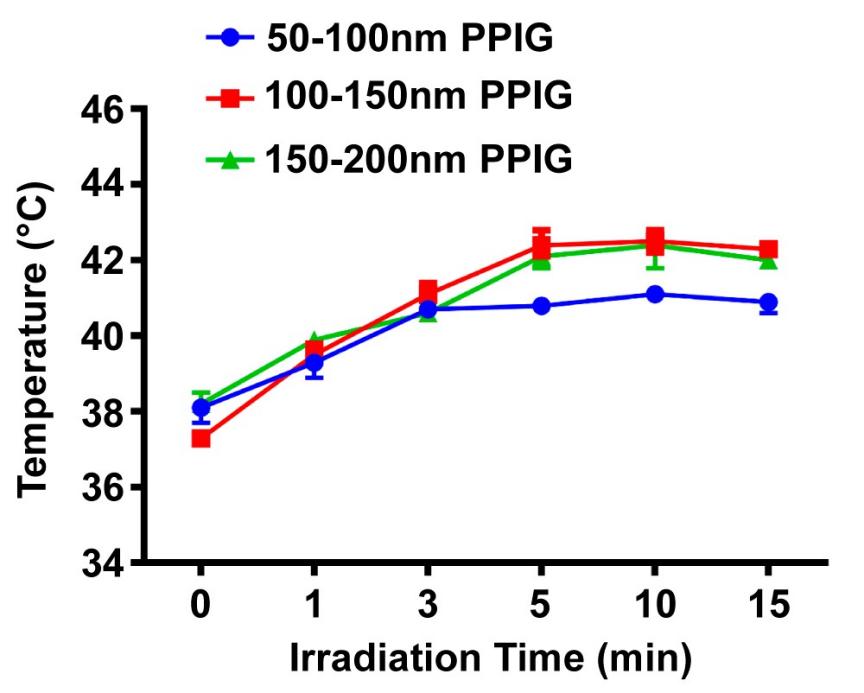


**Figure S7.** Temperature of LNs in living mice treated with PPIG NPs of different sizes under 808 nm laser irradiation.


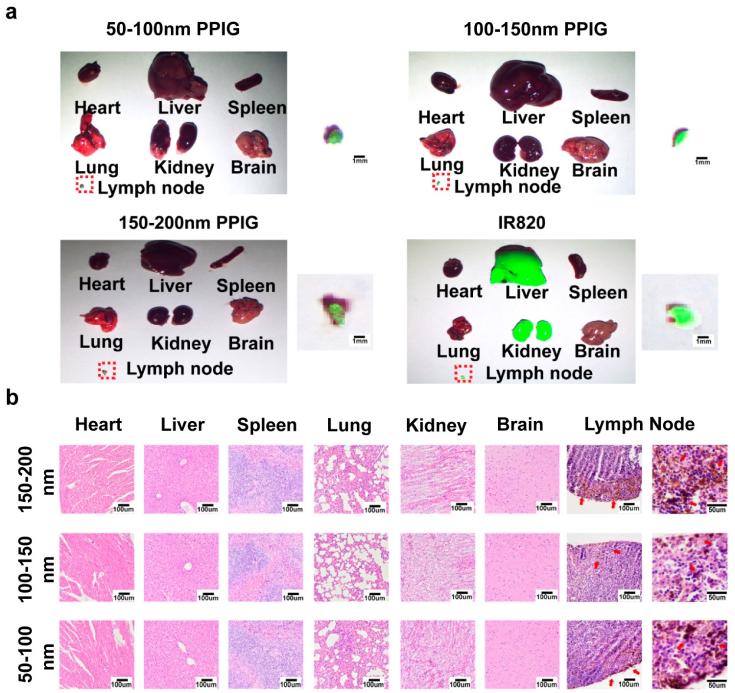


**Figure S8.** *In* *vivo* biodistribution and biosafety of PPIG NPs of different sizes in mice. a. *In*-*vivo* NIR fluorescence images of major organs and LNs after footpad injection of the different-sized of PPIG NPs. b. Histological examination of the major organs and LNs after footpad injection of the different-sized PPIG NPs. Red arrows indicate PPIG NPs in LNs.


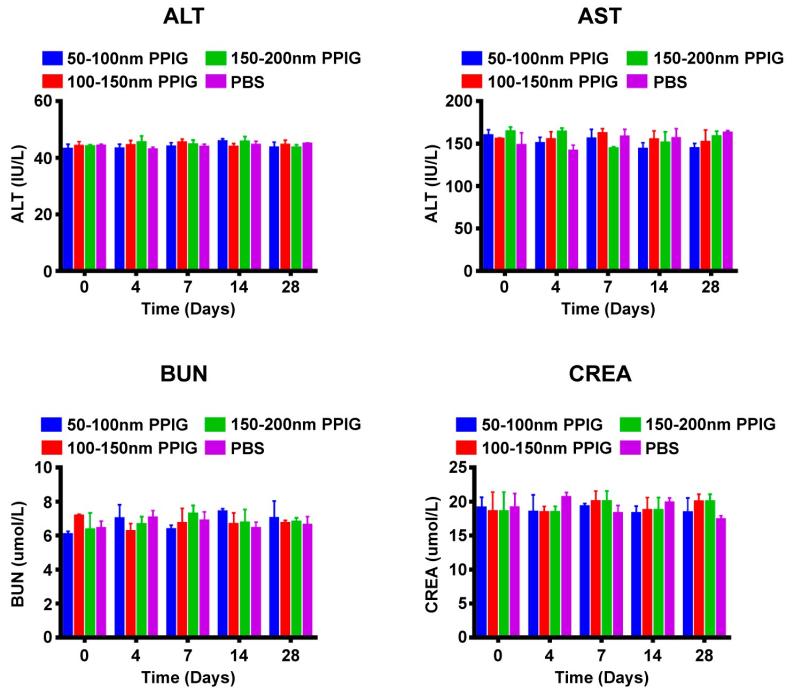


**Figure S9.** Changes in blood biochemistry indices (ALT, AST, BUN, and CREA) after footpad injection of PPIG NPs of different sizes in Balb/c.


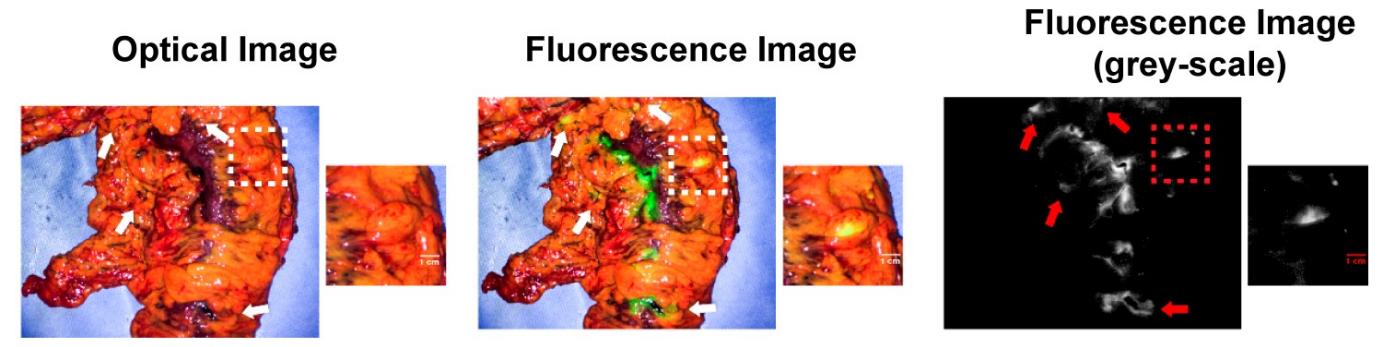


**Figure S10.** Optical/NIR fluorescence LN imaging in human specimens. Optical/NIR fluorescence LN images were acquired 60 min after subserosal injection of 50–100 nm PPIG NPs in the descending colon. Boxes and arrows indicate the LNs.


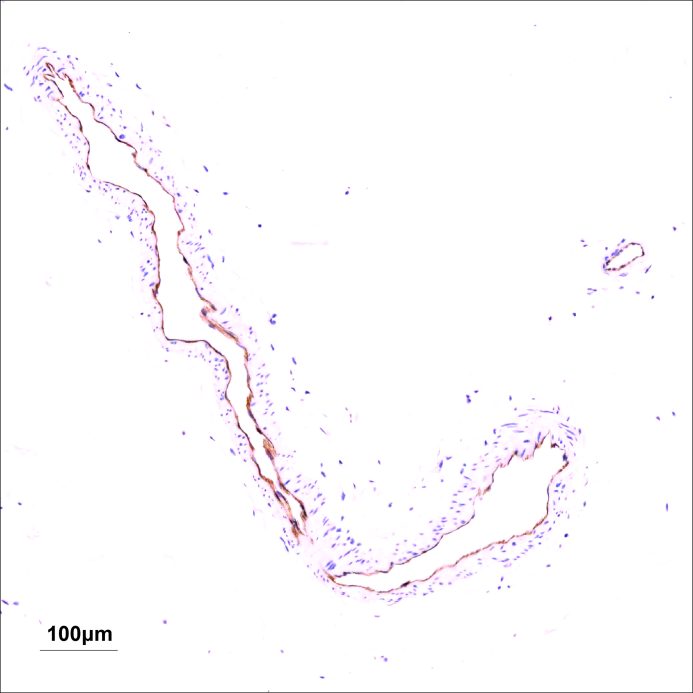


**Figure S11.** Representative D2-40 staining images of lymphatic vessel. Scale bar: 100 μm
